# Supplementary material for: Biocatalytic Radical C(sp3)–N Coupling via Active Site Templating
Source: Research Square preprint supplement (doi:10.21203/rs.3.rs-9204910/v1), 2026-04-03
Supplement: Supplementary file 1 [file 0f467afe94a71b526a165d07.xlsx]

## Sheet: Sheet1
Method and basis set:		#p M062X/6-31G*
No solvent									hf correction
	au	SCF done	dG	dG (ev)	vs sce				hf correction	corrected
sm-rad	-673.723	-673.981	0.173172	4.71225	-0.117747		△Eox		0.258243	-673.465		dG	dG (ev)	vs sce
sm+	-673.55	-673.812					-0.773021		0.261643	-673.288	SM	0.176572	4.79287	-0.0371307		corrected
																△Eox
int-rad	-961.102	-961.47	0.144764	3.93923	-0.890769				0.368575	-960.733	int	0.158487	4.30196	-0.528035		-0.490905
int-ox	-960.957	-961.339							0.382297	-960.575
Method and basis set:		#p M062X/6-31G*			Solvation:	Freq SCRF=(IEFPCM,Solvent=acetonitrile)
Acetonitrile	m062x								hf correction
	au	SCF done	dG	dG (ev)	vs sce				hf correction	corrected
sm-rad	-673.723	-673.981	0.174054	4.73625	-0.093747		△Eox		0.258258	-673.465		dG	dG (ev)	vs sce
sm+	-673.549	-673.811					-0.775226		0.261666	-673.287	SM	0.177462	4.81704	-0.0129602		corrected
																△Eox
int-rad	-961.101	-961.47	0.145565	3.96103	-0.868973				0.368698	-960.733	int	0.159131	4.31944	-0.510561		-0.497601
int-ox	-960.956	-961.338							0.382263	-960.573
2-water mechanism
Acetonitrile	m062x								hf correction
	au	SCF done	dG	dG (ev)	vs sce				hf correction	corrected
sm-rad	-673.723	-673.981	0.174054	4.73625	-0.093747		△Eox		0.258258	-673.465		dG	dG (ev)	vs sce
sm+	-673.549	-673.811					-1.41263		0.261666	-673.287	SM	0.177462	4.81704	-0.0129602		corrected
																△Eox
int-rad	-1113.85	-1114.32	0.122141	3.32363	-1.50637				0.461434	-1113.39	int	0.133012	3.61048	-1.21952		-1.20656
int-ox	-1113.73	-1114.2							0.472305	-1113.26
