# Supplementary material for: Biocatalytic Radical C(sp3)–N Coupling via Active Site Templating
Source: Research Square preprint supplement (doi:10.21203/rs.3.rs-9204910/v1), 2026-04-03
Supplement: Supplementary file 2 [file 628826318ff40cff7a0b95ea.docx]

data <- read.csv("model-2026.csv")

data

ZM <- lm(y ~ + `npa` + `b1` ,data=data)

summary(ZM)

coef(ZM)

# Create normalized columns

data$npa_norm <- scale(data$npa) # (x - mean)/sd

data$b1_norm <- scale(data$b1)

# Fit model with normalized predictors

ZM_norm <- lm(y ~ npa_norm + b1_norm, data = data)

summary(ZM_norm)

coef(ZM_norm)

library(DAAG)

# Fit model

model_2026 <- lm(y ~ b1 + npa, data = data)

# LOOCV (your output shows it works)

result <- cv.lm(data = data, form.lm = y ~ b1 + npa, m = nrow(data), plotit = FALSE)

# CORRECT EXTRACTION from DAAG cv.lm()

y_obs <- data$y # Actual y values from data

y_pred <- result$cvpred # Cross-validated predictions (this works!)

# Calculate Q²

PRESS <- sum((y_obs - y_pred)^2)

SSY <- sum((y_obs - mean(y_obs))^2)

Q2 <- 1 - PRESS / SSY

cat("PRESS =", round(PRESS, 3), "\n")

cat("SSY =", round(SSY, 3), "\n")

cat("Q² =", round(Q2, 3), "\n")

# Predicted vs Observed plot

plot(y_obs, y_pred,

xlab = "Observed y", ylab = "LOOCV Predicted y",

main = paste("LOOCV Q² =", round(Q2, 3)),

pch = 19, col = "blue", cex = 1.2)

abline(0, 1, col = "red", lwd = 2)

text(2, 10, paste("Q² =", round(Q2, 3)), cex = 1.2)

# Add R² line

r2_line <- lm(y_pred ~ y_obs)

abline(r2_line, col = "blue", lwd = 1, lty = 2)

plot_data <- data.frame(Observed = y_obs, Predicted = y_pred_cv)

# BEAUTIFUL PLOT

library(ggplot2)

library(DAAG)

ggplot(plot_data, aes(x = Observed, y = Predicted)) +

geom_point(size = 4, alpha = 0.8, color = "#2E86AB") + # Large blue points

geom_smooth(method = "lm", se = TRUE, color = "#A23B72",

linewidth = 2, alpha = 0.3) + # Thick regression line

geom_abline(intercept = 0, slope = 1, color = "#F18F01",

linewidth = 2, linetype = "dashed", alpha = 0.9) + # Perfect prediction line

geom_text(aes(x = min(Observed), y = max(Predicted)),

label = paste("Q² =", round(Q2, 3)), size = 6,

color = "white", fontface = "bold", hjust = 0, vjust = 1,

box.background = element_rect(fill = "#2E86AB", color = "white")) +

labs(title = "LOOCV: Predicted vs Observed",

subtitle = "y ~ d + b1 | R² = 0.78, Q² = [calculated]",

x = "Observed Values", y = "Cross-Validated Predictions") +

theme_minimal(base_size = 14) +

theme(

plot.title = element_text(size = 20, face = "bold", color = "#2E86AB"),

plot.subtitle = element_text(size = 14, color = "grey50"),

panel.grid.minor = element_blank(),

panel.grid.major = element_line(linewidth = 0.5, color = "grey90"),

axis.line = element_line(linewidth = 1, color = "grey20"),

axis.ticks = element_line(linewidth = 1.2, color = "grey20"),

axis.text = element_text(size = 12, color = "grey20"),

plot.background = element_rect(fill = "white", color = NA),

panel.background = element_rect(fill = "white", color = NA)

) +

coord_fixed(ratio = 1) +

xlim(min(y_obs)*0.9, max(y_obs)*1.1) +

ylim(min(y_pred_cv)*0.9, max(y_pred_cv)*1.1)
